# Supplementary material for: Pareto Optimality Explanation of the Glycolytic Alternatives in Nature
Source: PubMed Central journal article supplement (PMC6384925; doi:10.1038/s41598-019-38836-9), 2019-02-22
Supplement: 41598_2019_38836_MOESM1_ESM.pdf [file 41598_2019_38836_MOESM1_ESM.pdf]

1 **Supplementary Information for**  
2  
3 **Pareto Optimality Explanation of the Glycolytic Alternatives in Nature**

4  
5 Chiam Yu Ng, Lin Wang, Anupam Chowdhury, and Costas D. Maranas

6  
7 Corresponding author: Costas D. Maranas

8 Email: [costas@psu.edu](mailto:costas@psu.edu)

9

10

11 **This PDF file includes:**

12

13       Supplementary Information Text

14       Figs. S1 to S8

15       Tables S1 to S2

16       References for SI reference citations

17

18 **Other supplementary materials for this manuscript include the following:**

19

20       Supplementary Data Files S1 to S6

21 **Supplementary Information Text**

22 **Integer cut constraints and the runtime reduction of optStoic.**

23 Integer cut constraints are introduced in the optStoic formulation to exhaustively identify  
 24 alternate optimal pathways that satisfy the design equation. Herein, we define  $k$  as the  
 25 number of iteration for running optStoic algorithm ( $k \in \{1, 2, \dots, \kappa\}$ ).

26

27 The formulation of optStoic in the method section (see main text) was reformulated as a  
 28 combination of linear relations by introducing two non-negative real number (or integer)  
 29 variables for each  $v_j$  as followed:

$$v_j = v_j^f - v_j^r, \quad \forall j \in J$$

where  $v_j \in \mathbb{Z}, v_j^f \in \mathbb{Z}_{\geq 0}$  and  $v_j^r \in \mathbb{Z}_{\geq 0}$   
 or  $(v_j \in \mathbb{R}, v_j^f \in \mathbb{R}_{\geq 0}$  and  $v_j^r \in \mathbb{R}_{\geq 0})$   
 $|v_j| = v_j^f + v_j^r$

30

31 To this end, binary variables  $y_j^f$  and  $y_j^r$  are defined as followed:

$$y_j^f = \begin{cases} 1, & \text{if reaction } j \text{ carries non-zero flux in the forward direction } (v_j^f > 0) \\ 0, & \text{otherwise} \end{cases} \quad (1)$$

$$y_j^r = \begin{cases} 1, & \text{if reaction } j \text{ carries non-zero flux in the reverse direction } (v_j^r > 0) \\ 0, & \text{otherwise} \end{cases} \quad (2)$$

32 Likewise,  $y_j^{f^k}$  and  $y_j^{r^k}$  are binary variables associated with the solution from the  $k$ -th  
 33 iteration. At iteration  $k = \kappa$ , the following constraints are added to the modified optStoic  
 34 formulation:

$$\sum_{j \in J | y_j^{f^k} + y_j^{r^k} = 1} (1 - y_j^f - y_j^r) + \sum_{j \in J | y_j^{f^k} + y_j^{r^k} = 0} (y_j^f + y_j^r) \geq 1 \quad k = 1, 2, \dots, \kappa - 1 \quad (3)$$

$$y_j^f + y_j^r \leq 1 \quad (4)$$

$$y_j^f \varepsilon \leq v_j^f \leq y_j^f M \quad (5)$$

$$y_j^r \varepsilon \leq v_j^r \leq y_j^r M \quad (6)$$

35 Constraint 3 is the integer cut constraint that ensures that at least one of reaction  $j$  that was  
 36 identified in the previous iteration  $k$  is inactive in the current iteration. Constraint 4  
 37 enforces that only one of the binary variables (corresponding to the flux directions) for  
 38 each reaction  $j$  is active. Finally, constraints 5 and 6 restrict the flux (in forward or reverse  
 39 direction) to be strictly positive whenever the corresponding binary variable is active. The  
 40 parameter  $\varepsilon$  is a user-defined small positive real number. The MILP problems were solved  
 41 using the CPLEX v.12.6.1 solver accessed through the GAMS (v24.4.1) modeling system  
 42 and Gurobi Optimizer v6.5.1 using Python 2.7.

43

44 The runtime of the modified optStoic algorithm depends on the size of the search space  
 45 (i.e. database size). Therefore, blocked reactions (i.e., reactions incapable of carrying flux)

46 were identified first upon imposing the bounds on exchange fluxes (see constraint 4 in main  
 47 text) and excluded from the search space before running the algorithm. We also observed  
 48 that the runtime of optStoic significantly increases when more integer cuts are added. This  
 49 is caused by a large number of integer variables introduced in the second term of constraint  
 50 3 at each iteration  $k$ :

$$51 \quad \sum_{j \in J \mid y_j^{f^k} + y_j^{r^k} \neq 1} (y_j^f + y_j^r)$$

52 Upon removal of the blocked reactions, there are still over 3,000 reactions exist in the set  
 53  $\{j \in J \mid y_j^{f^k} + y_j^{r^k} = 0\}$ . To solve this issue, we imposed an additional constraint on the  
 54 objective function as followed:

$$55 \quad \sum_{j \in J_{\text{exchange}}} |v_j| = z^*$$

57 and used the following integer cut to prevent the same pathway from being identified for  
 58 the same objective value  $z^*$ .

$$59 \quad \sum_{j \in J \mid y_j^{f^k} + y_j^{r^k} = 1} (1 - y_j^f - y_j^r) \geq 1, \quad \forall k = 1, 2, 3, \dots$$

61 We run the modified optStoic algorithm in parallel for each fixed objective value  $z^*$  to  
 62 further reduce the total runtime.

### 63 **Assessing the thermodynamic feasibility of a pathway.**

64 The thermodynamic feasibility of each pathway under physiological concentration ranges  
 65 are assessed using the max-min driving force (MDF) formulation (1).

66 *Step 1:* The  $\Delta_r G_j^{\prime\circ}$  for each reaction involved in a pathway ( $j \in J_{\text{path}}$ ) is estimated using  
 67 the Component Contribution method (2) at pH 7, 25°C and ionic strength of 0.1 M (3, 4).

68 *Step 2:* The MDF problem is solved for each pathway, which minimizes the maximum  
 69  $\Delta_r G_j^{\prime}$  of a pathway by optimizing over the concentrations of all metabolites in the pathway.

70 The optimization formulation is given by:

$$\max_{c_i} \quad \min_j \{-\Delta_r G_j^{\prime}\} \quad (MDF) \quad (7)$$

$$\text{subject to } \Delta_r G_j^{\prime} = \Delta_r G_j^{\prime\circ} + RT \sum_{i \in I_{\text{path}}} S_{ij}^T \ln c_i, \quad \forall j \in J_{\text{path}} \quad (8)$$

$$\ln c_i^{\min} \leq \ln c_i \leq \ln c_i^{\max}, \quad \forall i \in I_{\text{path}} \quad (9)$$

$$\ln r_p^{\min} \leq \ln r_p \leq \ln r_p^{\max}, \quad \forall p \in \mathbf{P} \quad (10)$$

71 where  $I_{\text{path}}$  is the set of all metabolites and  $J_{\text{path}}$  is the set of all reactions in a pathway,  $c_i$   
 72 is the concentration of metabolite  $i$ ,  $R$  is the gas constant,  $T$  is the temperature,  $r_p$  is the  
 73 concentration ratio for an ordered pair of metabolites  $p$  (e.g.,  $p =$   
 74  $(ATP, ADP)$ ,  $r_{(ATP, ADP)} = c_{ATP}/c_{ADP}$ ), and  $\mathbf{P}$  is a set of metabolite pairs (e.g.,  $\mathbf{P} \in$   
 75  $\{(ATP, ADP), (NADPH, NADP^+), (NADH, NAD^+)\}$ ). Note that the  $S$  matrix here refers to  
 76 the stoichiometric matrix of the pathway with  $S \in \mathbb{R}^{|I_{\text{path}}| \times |J_{\text{path}}|}$ .  
 77

78

79 Constraint 8 relates the Gibbs free energy of reaction ( $\Delta_r G'_j$ ) with the standard Gibbs free  
80 energy of reaction ( $\Delta_r G'^{\circ}_j$ ) and the mass action ratio. The concentrations of all metabolites  
81 are allowed to vary between 1  $\mu\text{M}$  ( $c_i^{min}$ ) and 100 mM ( $c_i^{max}$ ) in constraint 9.  
82 Concentration ratios of common cofactor pairs (e.g., NADPH/NADP<sup>+</sup>, NADH/NAD<sup>+</sup> and  
83 ATP/ADP) play an important role in a cell as they determine the driving force of a large  
84 number of biosynthesis reactions (5). The concentration ratios of energy and redox  
85 cofactors are therefore allowed to vary within the maximum and minimum values found in  
86 the literature (6-8) and the Bionumbers database (9) in constraint 10. Constraint 9 is  
87 optional depending on the case study. Herein, we assumed that the designed pathway  
88 operates at steady-state and within a single compartment of a cell at a temperature ( $T$ ) of  
89 25°C, an ionic strength of 0.1 M and pH 7.0. The pathway with a positive objective  
90 function (MDF) indicates that it is thermodynamically infeasible within the given  
91 physiological concentration (and ratio) ranges is omitted from the subsequent step.  
92 Importantly, the objective function of the enzyme cost minimization problem is convex  
93 only when all  $\Delta_r G'_j < 0$  in a pathway. The MDF problem is solved using Gurobi Optimizer  
94 v6.5.1 solver and Python script modified from the Component Contribution Python  
95 package (2).

96 We have previously found that when imposing the metabolite concentration ranges  
97 (constraint 9) strictly to experimentally measured metabolite levels, the MDF formulation  
98 is often over-constrained and may become infeasible due to several factors. They include:  
99 (i) measurement errors of the absolute intracellular metabolite concentrations, (ii)  
100 estimation errors of Gibbs free energy from group-contribution based approaches, (iii) the  
101 MDF formulation assumes that metabolite concentrations are homogenous (i.e.,  
102 compartmentalization of metabolites and potential occurrence of substrate-channeling are  
103 ignored), and (iv) MDF analysis is performed with a pathway and not on the entire  
104 metabolic network. In addition, when we added the uncertainties in  $\Delta_r G'_j^{\circ}$  to the MDF  
105 formulation (i.e., allowing the  $\Delta_r G'_j^{\circ}$  of each reaction to vary between a range given by  
106  $\Delta_r G'_j^{\circ} \pm SE_j$  in constraint 8), we found that MDF analysis will identify the more optimistic  
107 solution given the degree of freedom to have a more negative  $\Delta_r G'_j^{\circ}$ . Since, we are  
108 comparing between pathways, the relative contribution of the errors of  $\Delta_r G'_j^{\circ}$  estimation  
109 has a lesser contribution towards the overall analysis and would not affect our conclusions.  
110 Therefore, MDF analysis of the pathways is studied within a larger physiological  
111 metabolite concentration ranges, and the errors of Gibbs free energy are not considered in  
112 the study.

### 113 **Minimization of protein cost.**

114 The minimal enzyme demand in units of mg protein/mmol glucose/h for each one of the  
115 thermodynamically feasible pathways is then estimated based on the enzyme cost  
116 minimization (ECM) method (10, 11). The formulation is as followed:

$$\text{minimize PC} = \frac{1}{v_{EX\_glc}} \sum_j M_{E,j} \lambda_{E,j} \quad (ECM) \quad (11)$$

subject to  $\lambda_{E,j}$

$$= \frac{v_j}{k_{cat,j}^+} \left( 1 - \exp\left(\frac{\Delta_r G_j'}{RT}\right) \right)^{-1} \left( 1 + \prod_{i \in I_{re,j}} \left(\frac{K_{M,ij}}{c_i}\right)^{q_{ij}^+} \right), \forall j \quad (12)$$

$\in J_{path}$

$$\Delta_r G_j' = \Delta_r G_j'^{\circ} + RT \ln \frac{\prod_{i \in I_{pr,j}} c_i^{q_{ij}^-}}{\prod_{i \in I_{re,j}} c_i^{q_{ij}^+}}, \quad \forall j \in J_{path} \quad (13)$$

$$\Delta_r G_j' < 0, \quad \forall j \in J_{path} \quad (14)$$

$$c_i^{min} \leq c_i \leq c_i^{max}, \quad \forall i \in I_{path} \quad (15)$$

$$r_p^{min} \leq r_p \leq r_p^{max}, \quad \forall p \in P \quad (16)$$

117

118 where  $M_{E,j}$  is the molecular weight of enzyme per active site for reaction  $j$ ,  $v_{EX\_glc}$  is the  
 119 glucose uptake flux (mmol Glucose/h),  $\lambda_{E,j}$  is the enzyme level for reaction  $j$ ,  $v_j$  is the flux  
 120 through reaction  $j$ ,  $k_{cat,j}^+$  is the turnover number of the reaction in the forward direction,  
 121  $I_{re,j}$  is the set of reactants in reaction  $j$ ,  $I_{pr,j}$  is the set of products in reaction  $j$ , the set of all  
 122 metabolites in the pathway  $I_{path}$  is the union of  $I_{re,j}$  and  $I_{pr,j}$ ,  $K_{M,ij}$  is the Michaelis-Menten  
 123 constant of the enzyme for reaction  $j$  towards metabolite  $i$ ,  $q_{ij}^+$  and  $q_{ij}^-$  is the stoichiometric  
 124 coefficient of metabolite  $i$  in reaction  $j$ .  $q_{ij}^+ > 0$  if metabolite  $i$  is a reactant in reaction  $j$   
 125 and  $q_{ij}^+ = 0$  otherwise, whereas  $q_{ij}^- > 0$  if metabolite  $i$  is a product in reaction  $j$  and  $q_{ij}^- =$   
 126  $0$  otherwise. Note that in the preprocessing step, all the reactions are re-arranged such that  
 127 flux  $v_j$  through each of them is strictly positive.

128

129 The objective function (equation 11) involves the minimization of the sum of the enzymatic  
 130 cost ( $\mu\text{g Protein/ mmol Glucose/ h}$ ) for each reaction in the pathway normalized by the  
 131 glucose uptake rate. Constraint 12 defines the enzyme level for a reaction  $j$  as a function  
 132 derived from the reversible Michaelis-Menten kinetic equation (10). Constraint 13 is  
 133 equivalent to constraint 8 recasted using concentrations. Constraint 14 ensures that all  
 134 reactions have a negative change in free energy and prevents division by zero in equation  
 135 12. Constraints 15 and 16 impose the bounds on the concentration ranges and concentration  
 136 ratio ranges. The above formulation can be simplified by substituting the concentration  
 137 variable  $c_i$  with logarithmic concentrations  $x_i = \ln c_i$  and thus converting the product term  
 138 into a summation.

139

140 According to Flamholz *et al.* (10), the enzyme cost minimization (ECM) formulation can  
 141 be rewritten by substituting  $x_i = \ln c_i$  as followed:

142

$$\text{minimize PC} = \frac{1}{v_{EX\_glc}} \sum_j M_{E,j} \lambda_{E,j} \quad (ECM) \quad (17)$$

$$\text{subject to } \lambda_{E,j} = \frac{v_j}{k_{cat,j}^+} \frac{1 + \exp\left(\sum_{i \in I_{re,j}} q_{ij}^+ (\ln K_{M,ij} - x_i)\right)}{1 - \exp\left(\sum_{i \in I_{path}} S_{ij}^T x_i + \frac{\Delta_r G_j'^0}{RT}\right)}, \forall j \in J_{path} \quad (18)$$

$$\Delta_r G_j' = \Delta_r G_j'^0 + R \cdot T \cdot \sum_{i \in I_{path}} S_{ij}^T x_i, \quad \forall j \in J_{path} \quad (19)$$

$$\Delta_r G_j' \leq 0 - \varepsilon, \quad \forall j \in J_{path} \quad (20)$$

$$\ln c_i^{min} \leq x_i \leq \ln c_i^{max}, \quad \forall i \in I_{path} \quad (21)$$

$$\ln r_p^{min} \leq \ln r_p \leq \ln r_p^{max}, \quad \forall p \in P \quad (22)$$

143 Using log-concentration simplifies the formulation as the product term in equations 12 and  
 144 13 can be replaced by the summation term in equations 18 and 19, respectively. Note that  
 145 we have set  $\varepsilon$  to a very small number (i.e.,  $1e^{-6}$ ) to ensure that the denominator of  $\lambda_{e,j}$  does  
 146 not become zero. We increase  $\varepsilon$  stepwise by 10-fold up to 0.1 if the optimization failed to  
 147 converge at a lower  $\varepsilon$  value. If the optimization still fails to terminate successfully at  $\varepsilon =$   
 148 0.1, we exclude the pathway from the final solution.  
 149

150 The optimal concentrations of metabolites obtained from the MDF problem are used as the  
 151 initial condition for the ECM problem, which is then solved using the sequential least  
 152 squares quadratic programming method (Python SciPy package). Due to the lack of  
 153 experimentally measured kinetic parameters, we assumed generic values ( $M_E =$   
 154  $40 \text{ kDa}$ ,  $k_{cat} = 79 \text{ s}^{-1}$  and  $K_M = 200 \text{ } \mu\text{M}$ ) (12) for all kinetic parameters as was carried  
 155 out in the original study (10). This implies that all enzymes were treated as equally fast in  
 156 every pathway. The allowable metabolite concentration ranges are identical to that of the  
 157 MDF analysis.

158  
 159

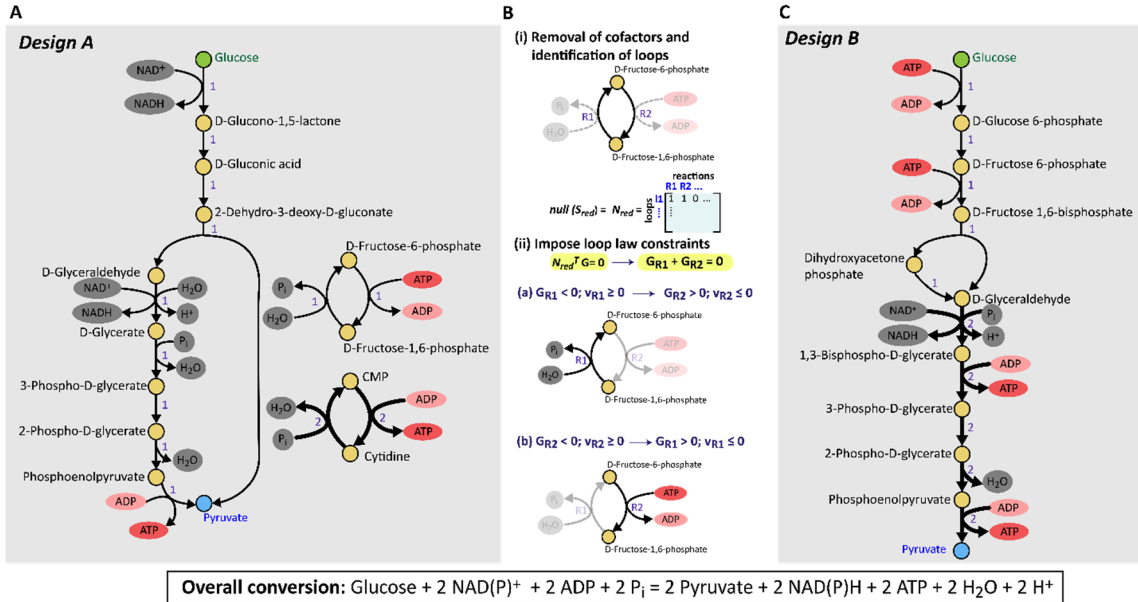

160

161 **Fig. S1.** Pathways shown here perform the overall conversion defined below the panels.  
 162 (A) Design A is a pathway with disjoint subnetworks that generate cofactors such as ATP.  
 163 This design is obtained using the previous optStoic formulation. (B) The  $\mathbf{S}_{int}$  matrix, which  
 164 contains only internal reactions, was processed by removing rows containing cofactors.  
 165 The basis of the null space of the resulting  $\mathbf{S}_{red}$  matrix is then obtained ( $\text{null}(\mathbf{S}_{red}) =$   
 166  $\mathbf{N}_{red}$ ). Each row of the  $\mathbf{N}_{red}$  matrix is an internal cycle that results in no net non-cofactor  
 167 metabolite production. The loop law is imposed as  $\mathbf{N}_{red}^T \mathbf{G} = \mathbf{0}$ , which implies that flux  
 168 could traverse only through one of the directions in a loop. Two cases are shown here for  
 169 the loop involving reaction R1 (D-Fructose-1,6-phosphate + H<sub>2</sub>O → D-Fructose-6-  
 170 phosphate + P<sub>i</sub>) and R2 (D-Fructose-6-phosphate + ATP → D-Fructose-1,6-phosphate +  
 171 ADP). In case (ii) (a), when reaction R1 is active ( $v_{R1} > 0$ ), then reaction R2 can carry  
 172 only zero flux or flux in the same direction with R1. (C) After adding the loop law  
 173 constraints, we found that ATP and redox generation occurs only on the main carbon  
 174 transfer pathway.

175

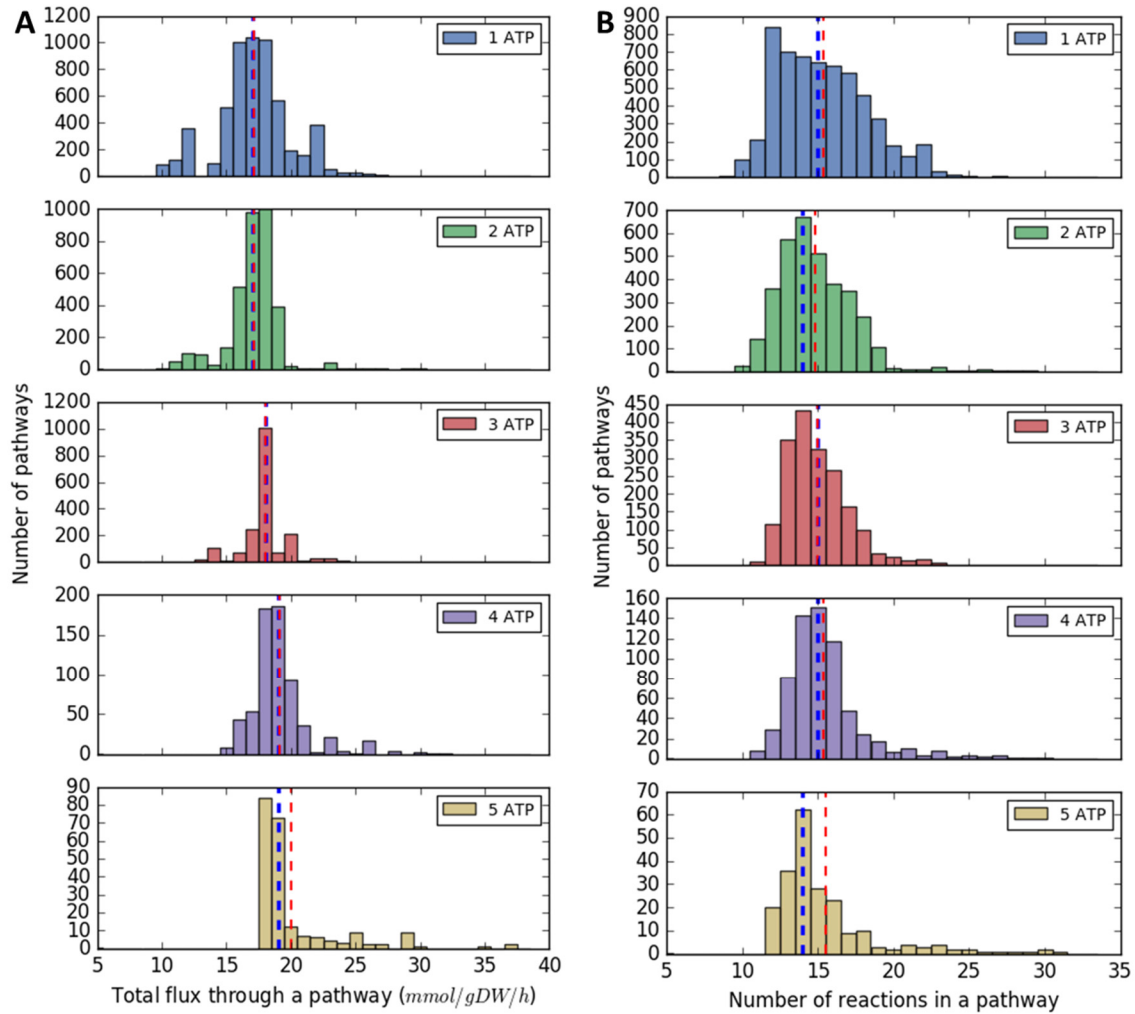

176

177 **Fig. S2.** The distribution of the glycolytic pathway alternatives based on (A) total flux  
 178 through a pathway, and (B) the number of reactions in a pathway. Note that the total flux  
 179 through a pathway and the number of reactions are calculated without accounting for the  
 180 exchange reactions. The colors represent the ATP yield per glucose (mol ATP/mol glucose)  
 181 generated by a pathway at a fixed glucose uptake flux. Red dashed lines indicate the mean  
 182 values, whereas blue dashed lines denote the median values.

183

184

185



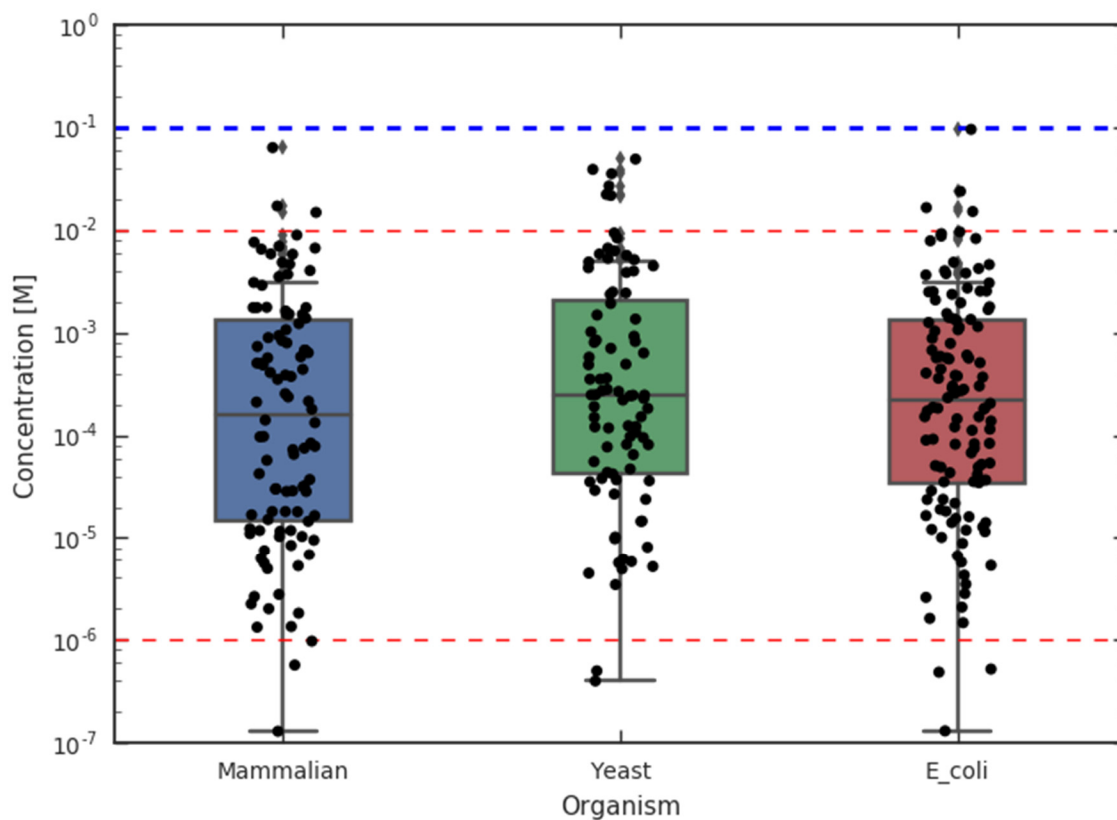

186

187 **Fig. S3.** Distribution of absolute metabolite concentrations across different organisms (8).  
 188 The fraction of metabolites that are within 1  $\mu$ M and 100 mM are 97.1%, 97.7% and 97.5%  
 189 for mammalian cells, yeast and *E. coli*, respectively. The fraction of metabolites that fall  
 190 within 1  $\mu$ M and 10 mM are 94.1%, 90.9% and 94.2% for mammalian cells, yeast and *E.*  
 191 *coli*, respectively.

192

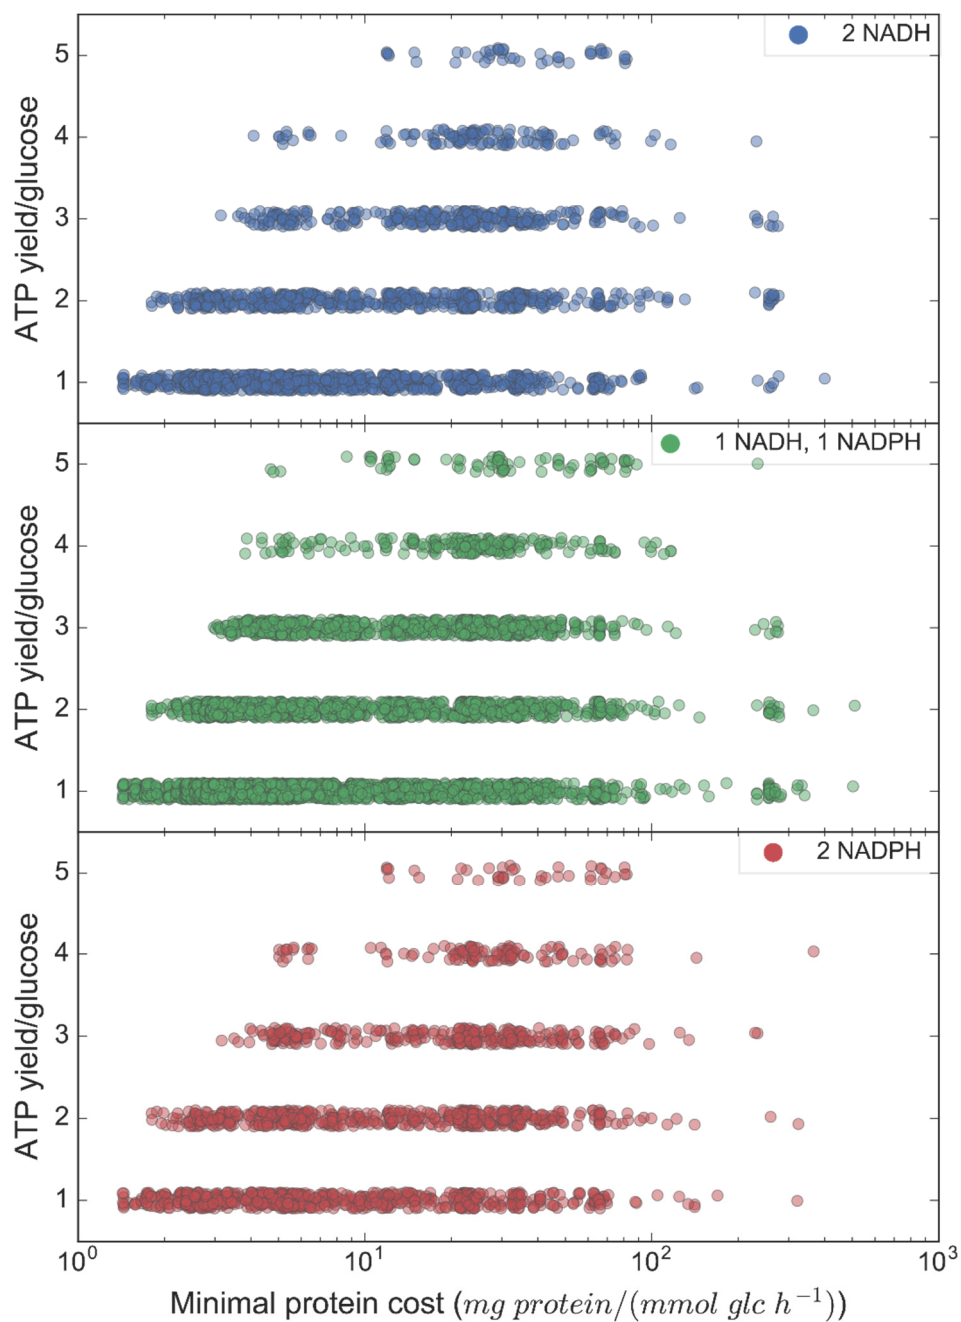

194

195 **Fig. S4.** The ATP yield versus minimal protein cost scatter plot. Note that the Y-axis is  
 196 categorical. Jittering effect was applied to the plot to show the distribution more clearly.  
 197 Pathways are color-coded based on the type of redox cofactors produced: (Blue) 2 NADH,  
 198 (Green) 1 NADH and 1 NADPH, and (Red) 2 NADPH.

199

200  
201

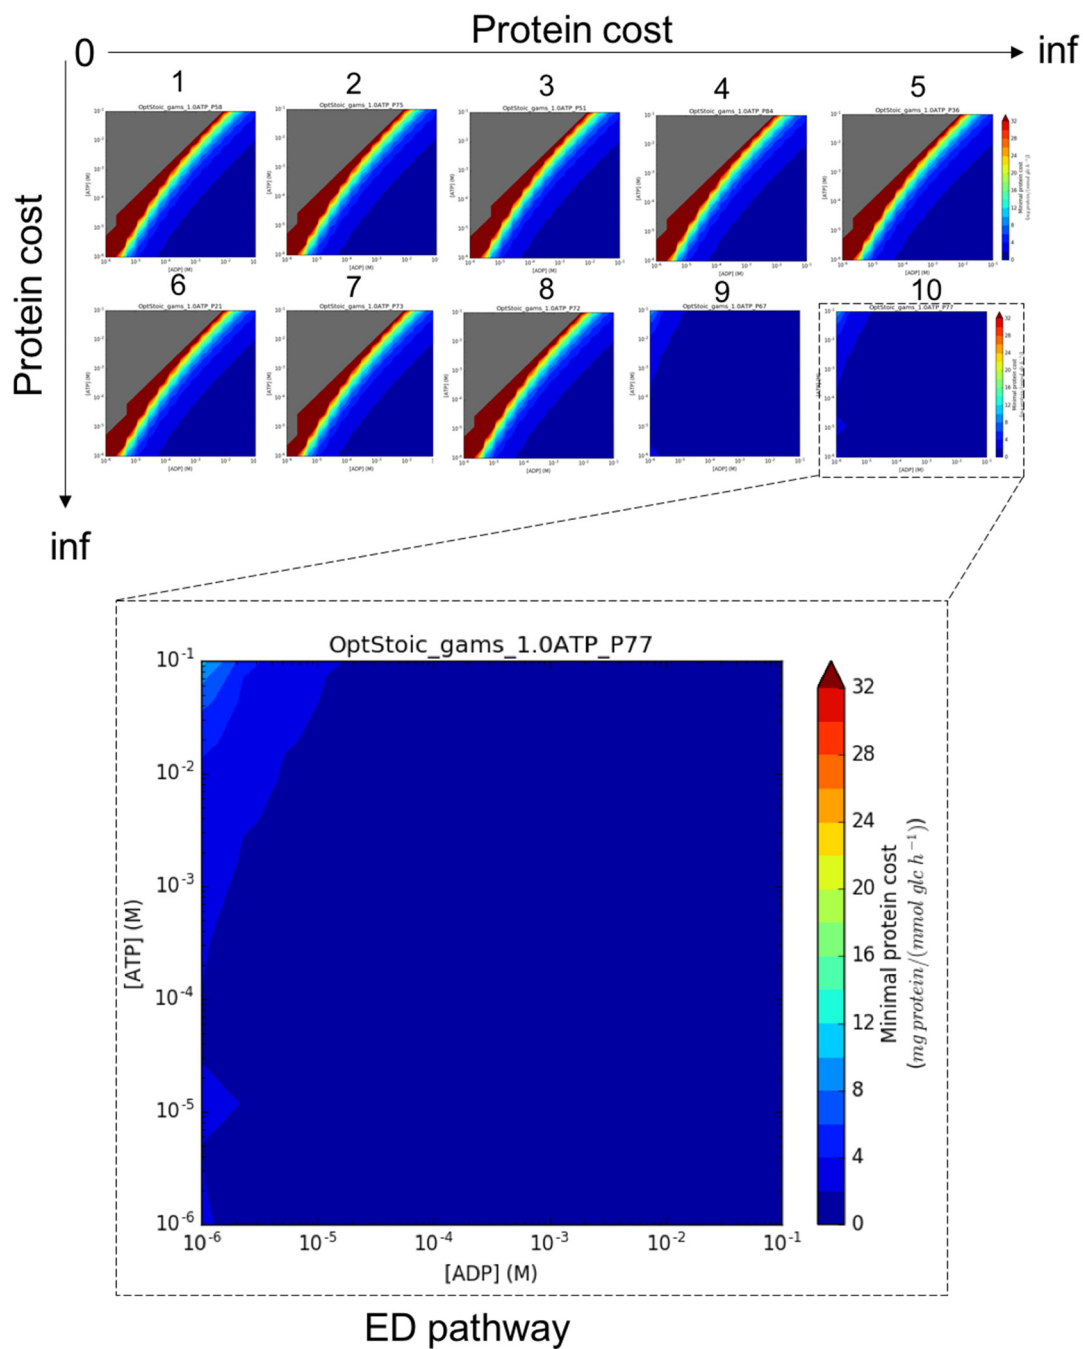

202  
203  
204  
205

**Fig. S5.** Robustness analysis of the effect of ATP and ADP concentrations on the top ten 1-ATP generating pathways. Note that the legends for the x and y-axes are the same for all the ten pathways.

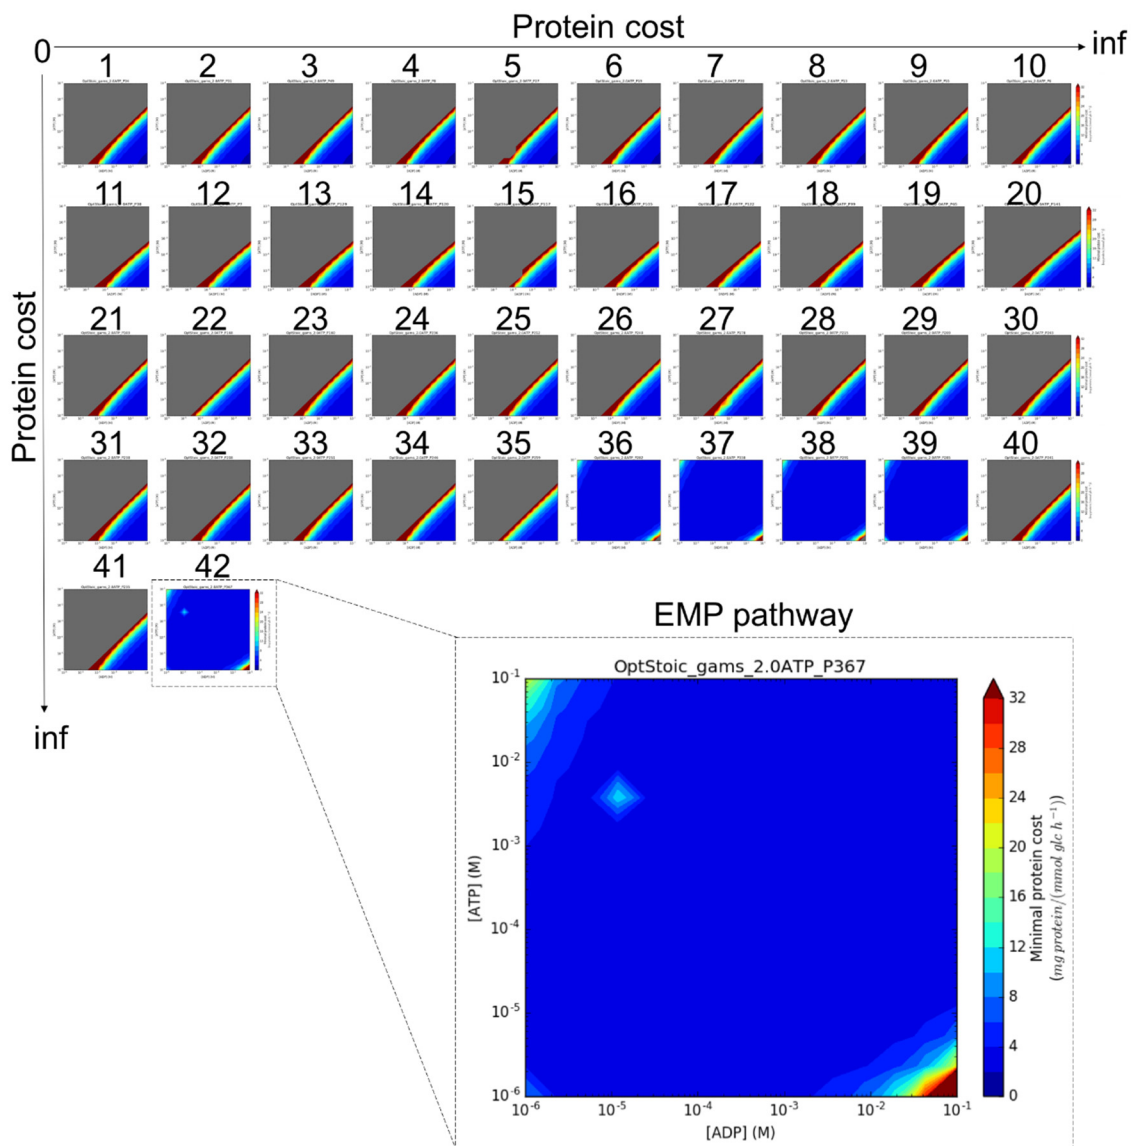

207

208 **Fig. S6.** Robustness analysis of the effect of ATP and ADP concentrations on the top forty-  
 209 two 2-ATP generating pathways. Note that the legends for the x and y-axes are the same  
 210 for all the 42 pathways. In addition, the ranges of the axes and heat map scales are the same  
 211 for each panel.

212

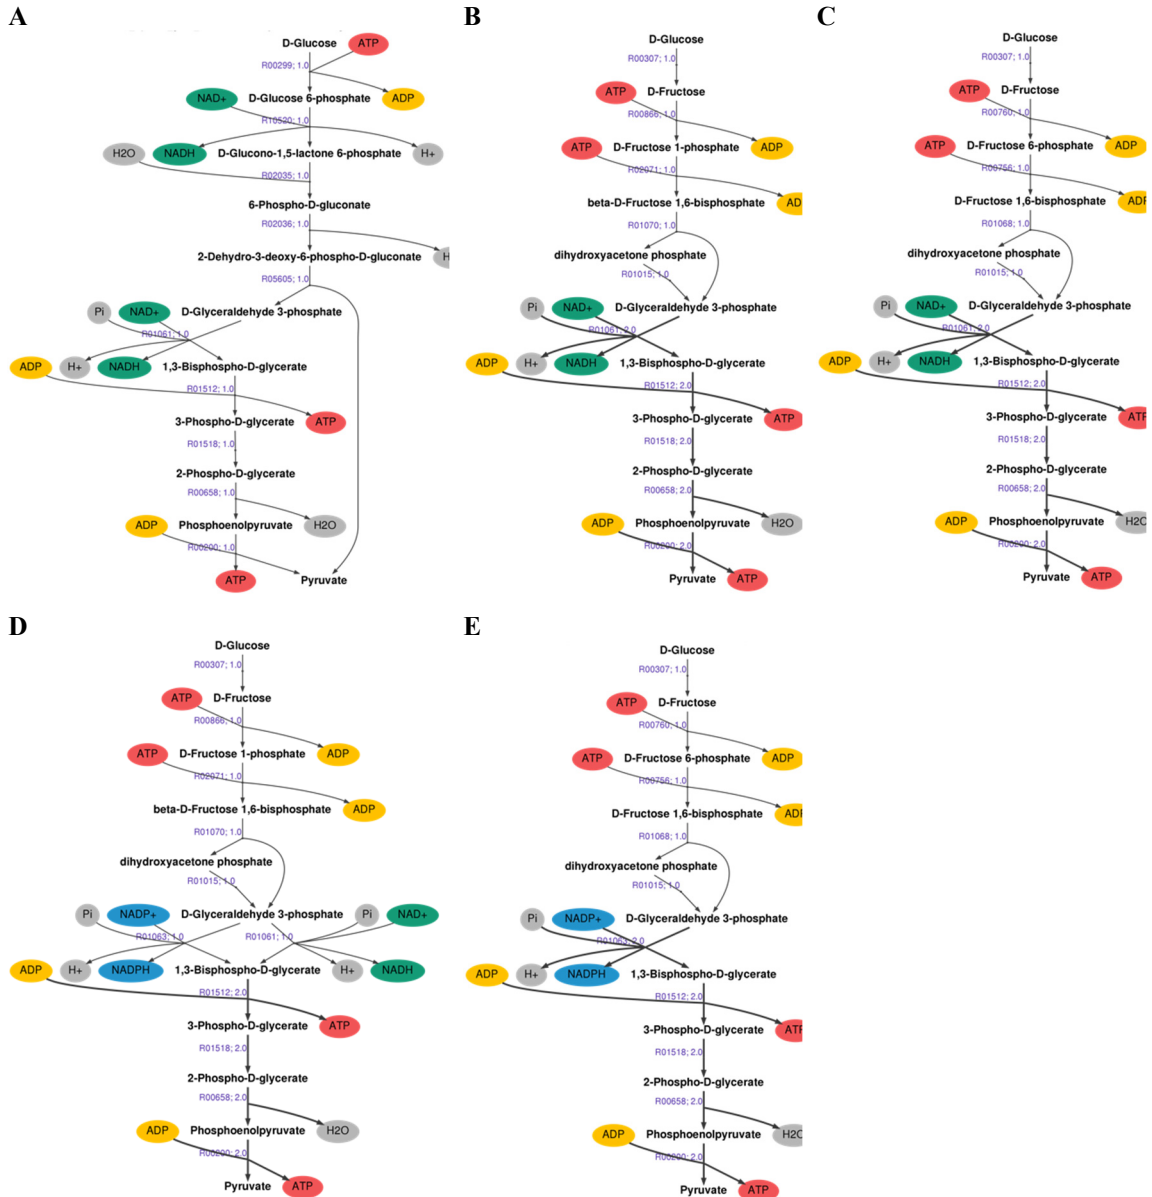

213 **Fig. S7.** Robust 1-ATP and 2-ATP generating glycolytic pathways within a broad range of  
 214 ATP/ADP ratio. The pathway diagrams were generated using the pathway visualization  
 215 tool described in the Method section. Pathway (A) is the 9th 1-ATP generating pathways  
 216 ranked by protein cost in Fig. S5. Pathways (B), (C), (D) and (E) are 36th to 39th 2-ATP  
 217 generating pathways ranked by protein cost in Fig. S6.  
 218

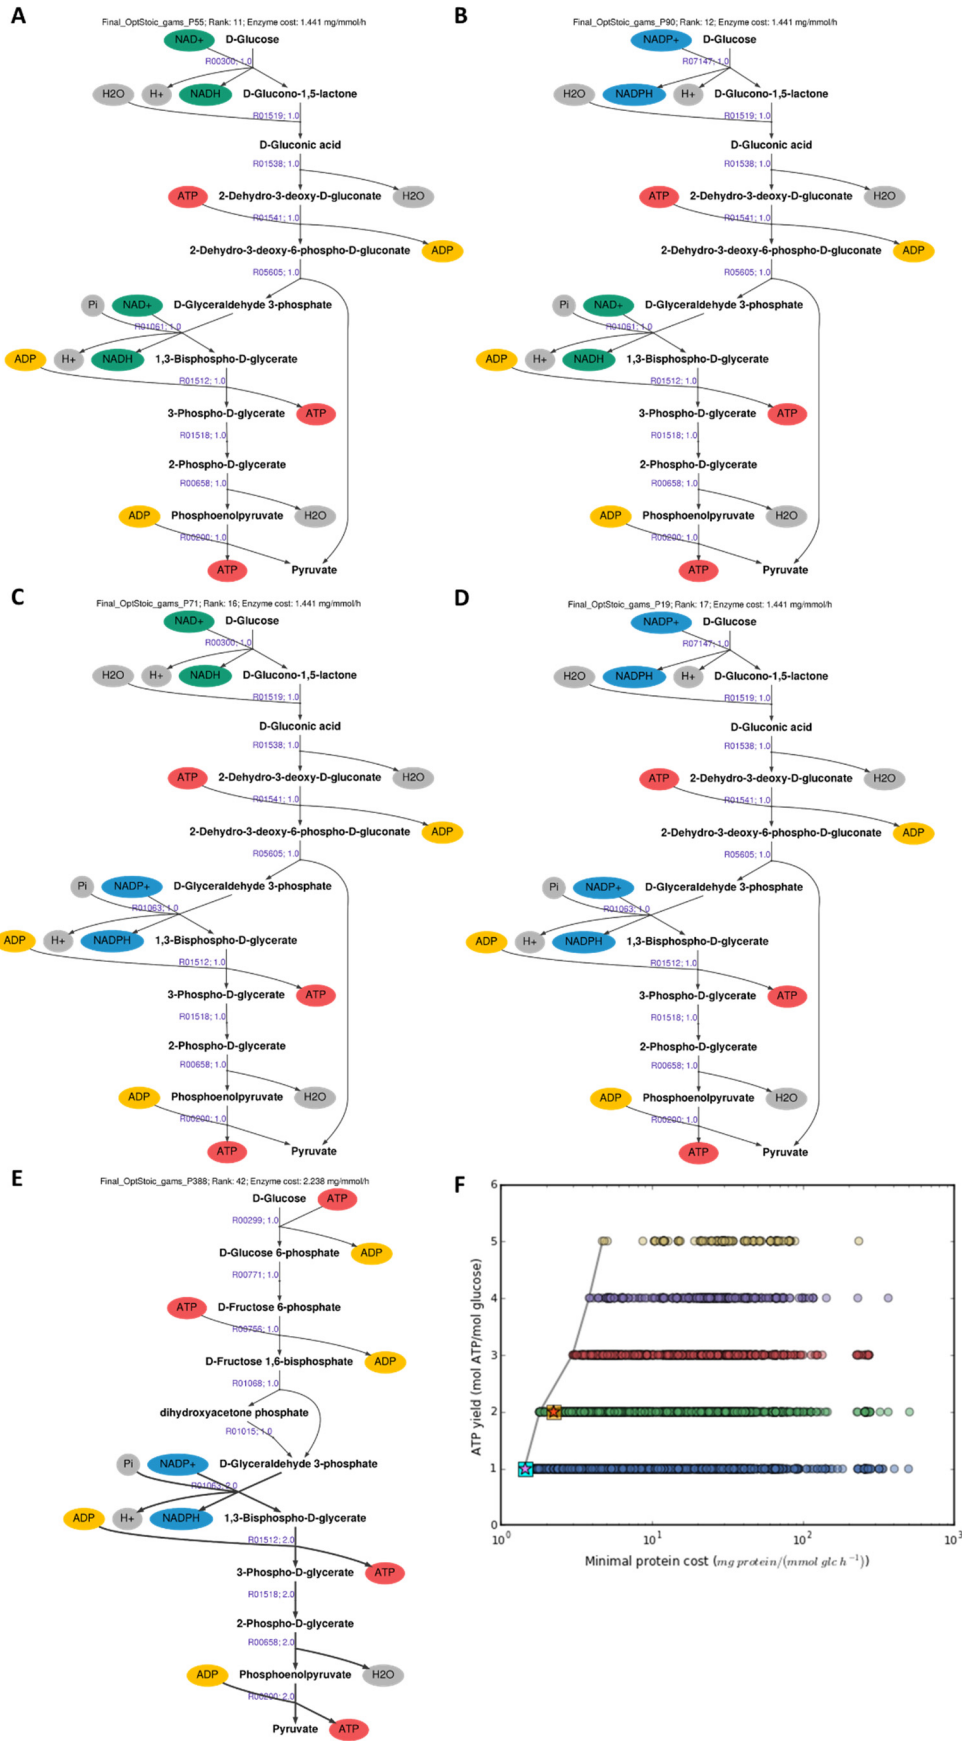

220 **Fig. S8.** (A-D) All four variants of the semi-phosphorylative ED pathway and (E) the  
221 NADPH-dependent EMP pathway described in the text. The pathway diagrams were  
222 generated using the pathway visualization tool described in the Method section. (F) The  
223 tradeoff plot of the minimal protein cost and the ATP yield of all glycolytic pathway  
224 variants as shown in Figure 3 (B). In addition to the ED (pink star) and the EMP pathways  
225 (red star), the semi-phosphorylative ED pathway variants (A-D) are represented as light-  
226 blue squares, whereas the NADPH-dependent EMP pathway is shown in the yellow square.  
227

228 **Table S1.** Cofactors that were removed from the S matrix when generating the internal  
 229 stoichiometric matrix ( $S^*$ ).

| KEGG ID | Description    | KEGG ID | Description         |
|---------|----------------|---------|---------------------|
| C00001  | H2O            | C00112  | CDP                 |
| C00002  | ATP            | C00131  | dATP                |
| C00003  | NAD+           | C00138  | Reduced ferredoxin  |
| C00004  | NADH           | C00139  | Oxidized ferredoxin |
| C00005  | NADPH          | C00144  | GMP                 |
| C00006  | NADP+          | C00206  | dADP                |
| C00007  | Oxygen         | C00286  | dGTP                |
| C00008  | ADP            | C00360  | dAMP                |
| C00009  | Orthophosphate | C00361  | dGDP                |
| C00010  | CoA            | C00362  | dGMP                |
| C00011  | CO2            | C00363  | dTDP                |
| C00013  | Diphosphate    | C00364  | dTMP                |
| C00015  | UDP            | C00365  | dUMP                |
| C00016  | FAD            | C00390  | Ubiquinol           |
| C00020  | AMP            | C00399  | Ubiquinone          |
| C00035  | GDP            | C00458  | dCTP                |
| C00044  | GTP            | C00459  | dTTP                |
| C00055  | CMP            | C00460  | dUTP                |
| C00063  | CTP            | C01352  | FADH2               |
| C00075  | UTP            |         |                     |
| C00080  | H+             |         |                     |
| C00081  | ITP            |         |                     |
| C00104  | IDP            |         |                     |
| C00105  | UMP            |         |                     |

230  
 231



232 **Table S2A.** The number of pathways that are thermodynamically feasible (MDF < 0) at  
 233 physiological concentration ranges and ratio.

| Conditions      | # of 1-ATP Pathways | # of 2-ATP Pathways | # of 3-ATP Pathways | # of 4-ATP Pathways | # of 5-ATP Pathways |
|-----------------|---------------------|---------------------|---------------------|---------------------|---------------------|
| optStoic        | 5,739               | 3,430               | 1,873               | 659                 | 215                 |
| condition (i)   | 4,550               | 2,891               | 1,542               | 466                 | 165                 |
| condition (ii)  | 2,549               | 1,099               | 281                 | 4                   | 0                   |
| condition (iii) | 2,525               | 1,098               | 281                 | 4                   | 0                   |
| condition (iv)  | 1,824               | 778                 | 173                 | 2                   | 0                   |
| condition (v)   | 538                 | 105                 | 0                   | 0                   | 0                   |
| condition (vi)  | 2,558               | 1,099               | 281                 | 4                   | 0                   |

- 234 i. All metabolites are allowed to vary between 1  $\mu$ M and 100 mM.  
 235 ii. Same with (i), except that ATP and ADP concentrations are bounded based on  
 236 Park *et al.* (8) (i.e.,  $1.66 \text{ mM} \leq C_{ATP} \leq 11.4 \text{ mM}$ ;  $0.429 \text{ mM} \leq C_{ADP} \leq$   
 237  $0.715 \text{ mM}$ ).  
 238 iii. Same with (ii), except that the concentration range of CO<sub>2</sub> was bounded based on  
 239 Park *et al.* (8) (i.e.,  $50 \mu\text{M} \leq C_{CO_2} \leq 10 \text{ mM}$ ).  
 240 iv. All metabolites are allowed to vary between 1  $\mu$ M and 100 mM except CO<sub>2</sub>. The  
 241 range of CO<sub>2</sub> was obtained from Park *et al.* (8) (i.e.,  $50 \mu\text{M} \leq C_{CO_2} \leq 10 \text{ mM}$ ).  
 242 The ratio ranges for different cofactor pairs were imposed as followed:  $0.2 \leq$   
 243  $\frac{C_{ATP}}{C_{ADP}} \leq 20$ ,  $0.2 \leq \frac{C_{NADPH}}{C_{NADP}} \leq 100$ ,  $0.0005 \leq \frac{C_{NADH}}{C_{NAD}} \leq 0.5$  based on data collected  
 244 from Bionumbers (9) and literature (6-8).  
 245 v. All metabolites other than CO<sub>2</sub> are allowed to vary between 1  $\mu$ M and 10 mM.  
 246 The range of CO<sub>2</sub> was obtained from Park *et al.* (8) (i.e.,  $50 \mu\text{M} \leq C_{CO_2} \leq 10$   
 247  $\text{mM}$ ). The ratio ranges for different cofactor pairs were imposed as followed:  
 248  $0.2 \leq \frac{C_{ATP}}{C_{ADP}} \leq 20$ ,  $0.2 \leq \frac{C_{NADPH}}{C_{NADP}} \leq 100$ ,  $0.0005 \leq \frac{C_{NADH}}{C_{NAD}} \leq 0.5$ .  
 249 vi. All metabolites are allowed to vary between 1  $\mu$ M and 100 mM. The ratio ranges  
 250 for different cofactor pairs were imposed as followed:  $1 \leq \frac{C_{ATP}}{C_{ADP}} \leq 10,000$ .

251

252  
253

**Table S2B.** All the constraints used for the simulation of Table S2A.

| <b>Conditions</b>                                                                                                                                     | <b>(i)</b> | <b>(ii)</b> | <b>(iii)</b> | <b>(iv)</b> | <b>(v)</b> | <b>(vi)</b> |
|-------------------------------------------------------------------------------------------------------------------------------------------------------|------------|-------------|--------------|-------------|------------|-------------|
| (A) $1 \mu\text{M} \leq C_i \leq 100 \text{ mM}$ for all metabolite $i$                                                                               | +          | +           | +            | +           |            | +           |
| (B) $1.66 \text{ mM} \leq C_{ATP} \leq 11.4 \text{ mM};$<br>$0.429 \text{ mM} \leq C_{ADP} \leq 0.715 \text{ mM}$                                     |            | +           | +            |             |            |             |
| (C) $50 \mu\text{M} \leq C_{CO_2} \leq 10 \text{ mM}$                                                                                                 |            |             | +            | +           | +          |             |
| (D) $0.2 \leq \frac{C_{ATP}}{C_{ADP}} \leq 20;$<br>$0.2 \leq \frac{C_{NADPH}}{C_{NADP}} \leq 100;$<br>$0.0005 \leq \frac{C_{NADH}}{C_{NAD}} \leq 0.5$ |            |             |              | +           | +          |             |
| (E) $1 \mu\text{M} \leq C_i \leq 10 \text{ mM}$ , for all metabolite $i$                                                                              |            |             |              |             | +          |             |
| (F) $1 \leq \frac{C_{ATP}}{C_{ADP}} \leq 10,000$                                                                                                      |            |             |              |             |            | +           |

254

255  
256  
257  
258  
259  
260  
261  
262  
263  
264  
265  
266  
267  
268  
269  
270  
271  
272  
273  
274  
275  
276  
277  
278  
279  
280  
281  
282  
283  
284  
285  
286  
287  
288  
289

## References

1. Noor E, *et al.* (2014) Pathway thermodynamics highlights kinetic obstacles in central metabolism. *PLoS computational biology* 10(2):e1003483.
2. Noor E, Haraldsdottir HS, Milo R, & Fleming RM (2013) Consistent estimation of Gibbs energy using component contributions. *PLoS computational biology* 9(7):e1003098.
3. Biemans-Oldehinkel E, Mahmood NA, & Poolman B (2006) A sensor for intracellular ionic strength. *Proceedings of the National Academy of Sciences of the United States of America* 103(28):10624-10629.
4. Storey KB (2004) *Functional Metabolism: Regulation and Adaptation* (John Wiley & Sons, Inc., Hoboken, NJ, USA) p 616.
5. Zhang J, *et al.* (2015) Determination of the Cytosolic NADPH/NADP Ratio in *Saccharomyces cerevisiae* using Shikimate Dehydrogenase as Sensor Reaction. *Scientific Reports* 5:12846.
6. Bennett BD, *et al.* (2009) Absolute metabolite concentrations and implied enzyme active site occupancy in *Escherichia coli*. *Nature chemical biology* 5(8):593-599.
7. Gerosa L, *et al.* (2015) Pseudo-transition Analysis Identifies the Key Regulators of Dynamic Metabolic Adaptations from Steady-State Data. *Cell Syst* 1(4):270-282.
8. Park JO, *et al.* (2016) Metabolite concentrations, fluxes and free energies imply efficient enzyme usage. *Nature chemical biology*.
9. Milo R, Jorgensen P, Moran U, Weber G, & Springer M (2010) BioNumbers--the database of key numbers in molecular and cell biology. *Nucleic acids research* 38(Database issue):D750-753.
10. Flamholz A, Noor E, Bar-Even A, Liebermeister W, & Milo R (2013) Glycolytic strategy as a tradeoff between energy yield and protein cost. *Proceedings of the National Academy of Sciences of the United States of America* 110(24):10039-10044.
11. Noor E, *et al.* (2016) The Protein Cost of Metabolic Fluxes: Prediction from Enzymatic Rate Laws and Cost Minimization. *PLoS computational biology* 12(11):e1005167.
12. Bar-Even A, *et al.* (2011) The moderately efficient enzyme: evolutionary and physicochemical trends shaping enzyme parameters. *Biochemistry* 50(21):4402-4410.
